# Supplementary material for: Sucrose synthases are not involved in starch synthesis in Arabidopsis leaves
Source: PubMed Central journal article supplement (PMC9122829; doi:10.1038/s41477-022-01140-y), 2022-04-28
Supplement: 41477_2022_1140_MOESM1_ESM.pdf [file 41477_2022_1140_MOESM1_ESM.pdf]

**Supplementary information**

---

**Sucrose synthases are not involved in starch synthesis in *Arabidopsis* leaves**

---

In the format provided by the authors and unedited

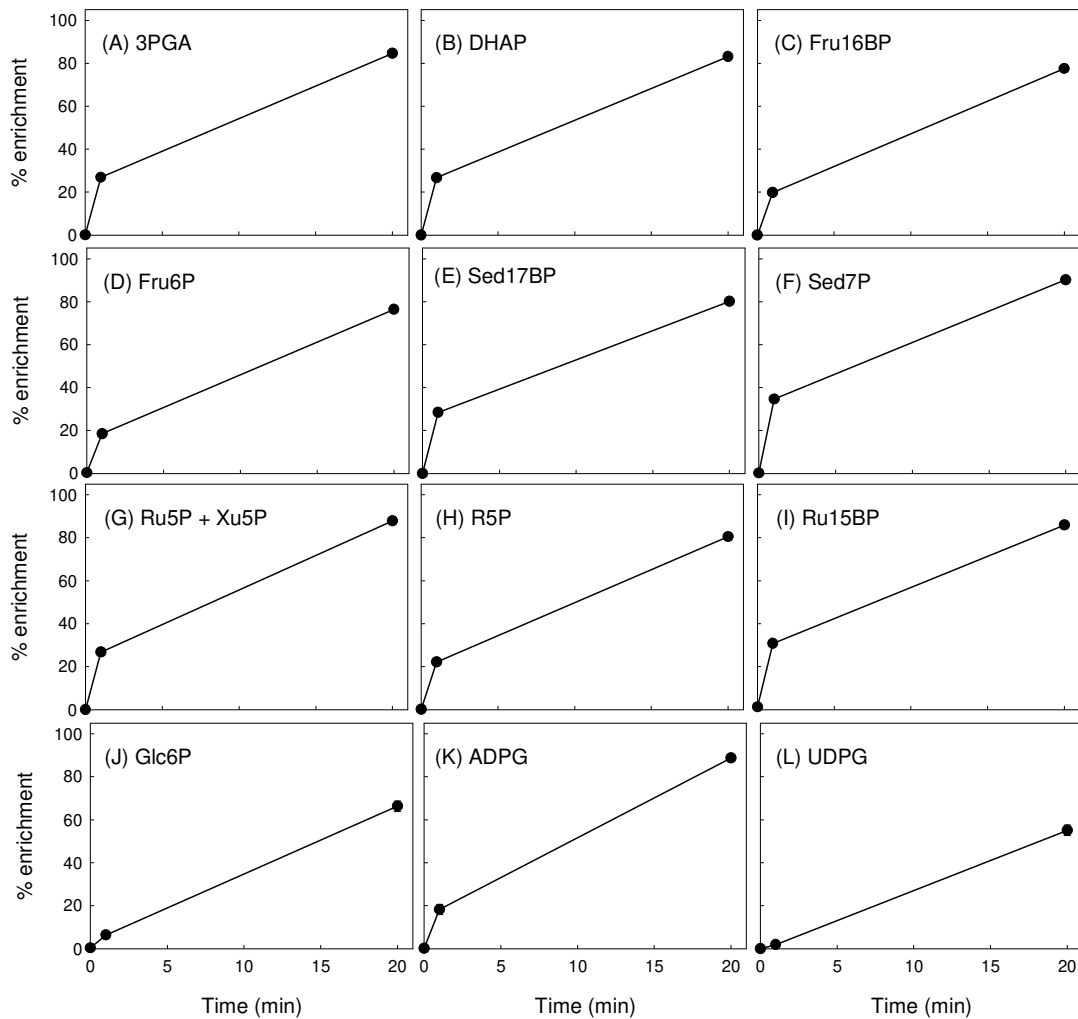

### Supplementary Figure S1. <sup>13</sup>C-labelling kinetics of phosphorylated intermediates and nucleotide sugars in wild-type Arabidopsis Col-0 leaves

Plants were grown in 12-h photoperiod. At 28 days after germination, rosettes were pulse labelled with <sup>13</sup>CO<sub>2</sub> (400 ppm) in the light (irradiance 150 μmol m<sup>-2</sup> s<sup>-1</sup>) for 0, 1 or 20 min. (between ZT4-ZT7) and isotopomers were quantified by LC-MS/MS as described in Szećowka et al. (2013) to calculate % enrichment (glucose moiety only for nucleotide sugars). Data are mean ± S.D. from three individual rosettes (*n*=3 biological replicates). Abbreviations: 3PGA, 3-phosphoglycerate; DHAP, dihydroxyacetone-phosphate; Fru16BP, fructose-1,6-bisphosphate; Fru6P, fructose 6-phosphate; Sed17BP, sedoheptulose-1,7-bisphosphate, Sed7P, sedoheptulose 7-phosphate; Ru5P + Xu5P, ribulose 5-phosphate + xylulose 5-phosphate; R5P, ribose 5-phosphate; Ru15BP, ribulose-1,5-bisphosphate; Glc6P, glucose 6-phosphate; ADPG, ADP-glucose; UDPG, UDP-glucose. Supplementary Table S1 contains the original data.

(A)

```
SUS5 TTTACCGCACAGACCGGAG-ATTCACCAAGTCTACACTTCCATTGATGAACTCTTGTATAGCCAAAGTGAGAATGACGAAACACATCGGTTATTTAGTG
PheThrAlaGlnAspArgAr-gPheThrLysPheTyrThrSerIleAspGluLeuLeuTyrSerGlnSerGluAsnAspGluHisIleGlyTyrLeuVal
sus5-1 TTTACCGCACAGACCGGAGCATTACCAAGTCTACACTTCCATTGATGAACTCTTGTATAGCCAAAGTGAGAATGACGAAACACATCGGTTATTTAGTG
PheThrAlaGlnAspArgSerIleHisGlnValLeuHisPheHisSTOP
sus5-2 TTT-----TCACCAAGTCTACACTTCCATTGATGAACTCTTGTATAGCCAAAGTGAGAATGACGAAACACATCGGTTATTAG
Phe-----SerProSerSerThrLeuProLeuMetAsnSerCysIleAlaLysValArgMetThrAsnThrSerValIleSTOP
```

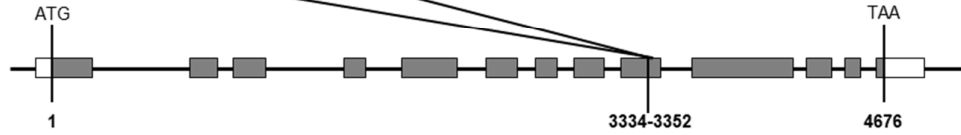

(B)

```
SUS6 GAAGTCTCTGAAGCACCAGACAAATGGGAAGTTAGAT
GluValLeuGluAlaProAspAsnGlyLysLeuAsp
sus6 GAAG-----CAATGGGAAGTTAG
GluA-----laMetGlySerSTOP
```

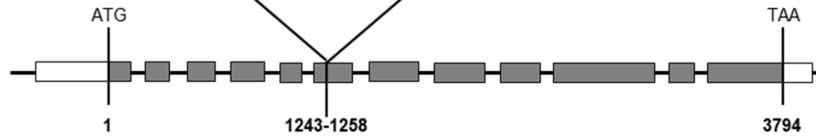

500 bp

□ UTR    ■ exon    — intron or intergenic region

### Supplementary Figure S2. Schematic diagram of the gene edited mutations in the Arabidopsis *SUS5* and *SUS6* genes.

(A) *SUS5* gene showing the wild-type (Col-0) sequence, the *sus5-1* allele containing a single base (C) insertion (shown in red) and the *sus5-2* allele containing a 20-bp deletion. (B) *SUS6* gene showing the wild-type (Col-0) sequence and the *sus6* allele containing a 16-bp deletion. All mutations generated premature STOP codons (shown in red). The dark grey and white boxes indicate translated and untranslated regions, respectively.

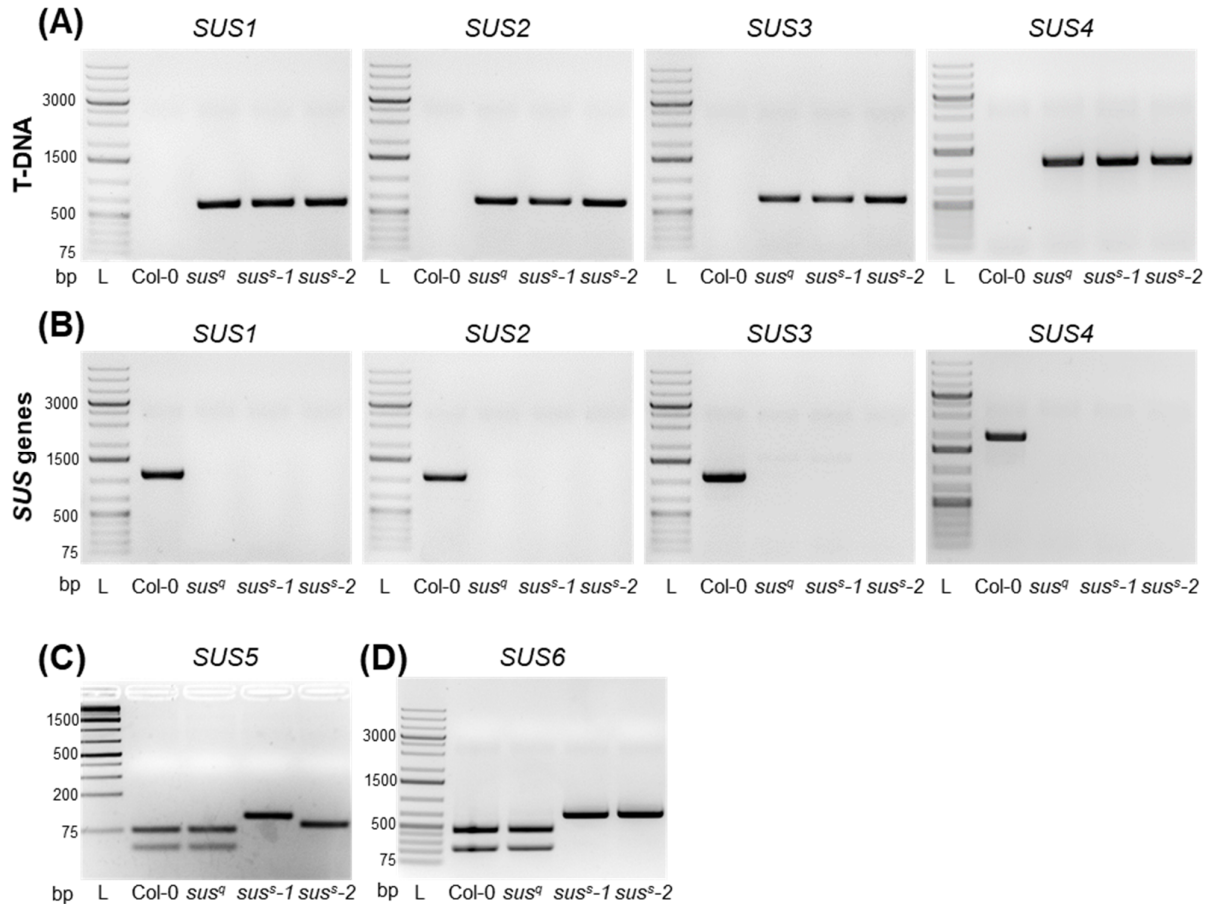

### Supplementary Figure S3. PCR genotyping of Arabidopsis *sus* mutants.

(A) T-DNA insertions in the *SUS1*, *SUS2*, *SUS3* and *SUS4* genes were confirmed by PCR using gene specific (LP) and T-DNA border primers (LBb1.3 for *sus1*, *sus2*, *sus3* and P66 for *sus4*). (B) Homozygosity of T-DNA insertion loci in the *SUS1*, *SUS2*, *SUS3* and *SUS4* genes was confirmed by genomic PCR using *SUS* gene specific primers (LP and RP) that flank the respective T-DNA insertions. (C) Identification of mutations in the *SUS5* gene by genomic PCR (using primers *sus5-Fw* and *sus5-Rv*) and restriction with *Hinf*I, yielding two fragments (75 and 37 bp) from the wild-type *SUS5* gene. (D) Identification of mutations in the *SUS6* gene by genomic PCR (using primers *sus6-Fw* and *sus6-Rv*) and restriction with *Van91*I, yielding two fragments (471 and 235 bp) from the wild-type *SUS6* gene. Abbreviations: L, GeneRuler 1-kb Plus DNA Ladder (Thermo Scientific); Col-0, wild type Columbia-0; *Sus<sup>q</sup>*, *sus1234* quadruple mutant; *sus<sup>s-1</sup>*, *sus12345<sup>1</sup>6* sextuple mutant; *sus<sup>s-2</sup>*, *sus12345<sup>2</sup>6* sextuple mutant. PCR genotyping was performed twice for the *SUS1-SUS4* genes (A-B) and three times for the *SUS5* (C) and *SUS6* (D) genes with consistent results.

AtGenExpress eFP: AT5G20830 / ASUS1, atsus1, SUS1

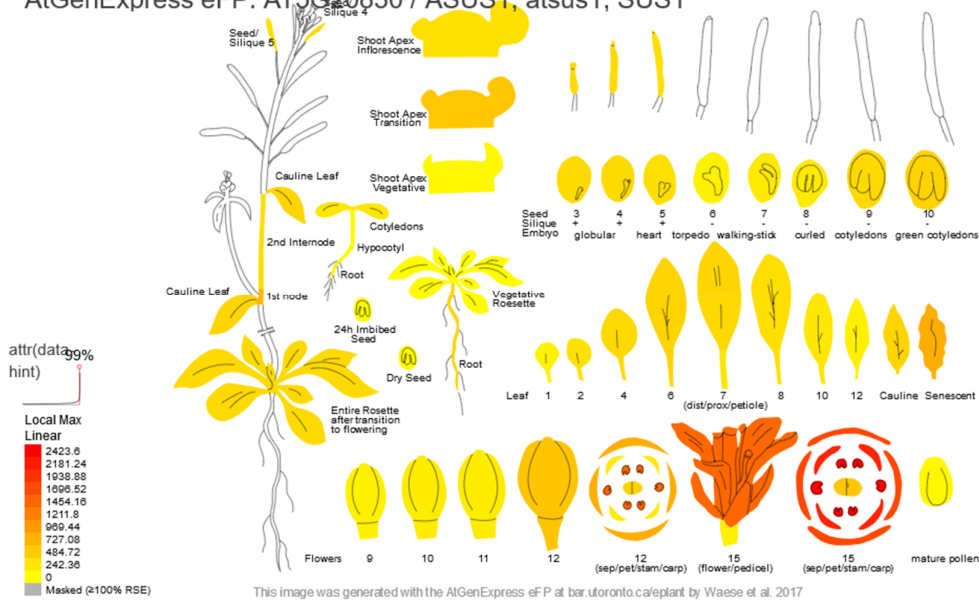

AtGenExpress eFP: AT5G49190 / ATSUS2, SSA, SUS2

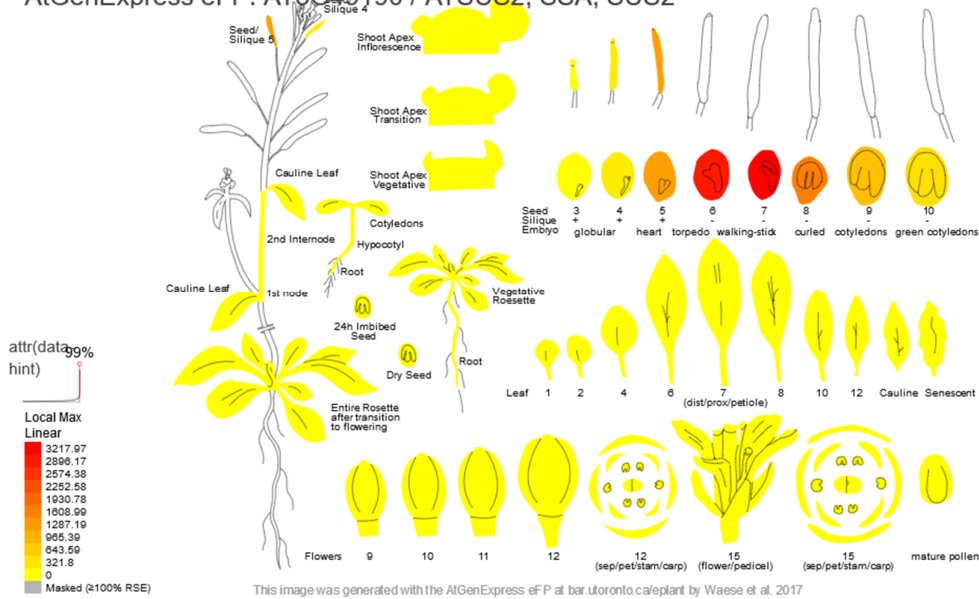

**Supplementary Figure S4a. Expression atlas of Arabidopsis *SUS1* and *SUS2* transcripts.**

*SUS1* (At5g20830) and *SUS2* (At5g49190) transcript abundance in different Arabidopsis tissues and developmental stages based on Affymetrix ATH1 array data from Schmid et al. (2005), and visualized with the Plant eFP browser (<https://bar.utoronto.ca/eplant>; Winter et al. (2007); Waese et al. (2017).

AtGenExpress eFP: AT4G02280 / *ATSUS3*, *SUS3*

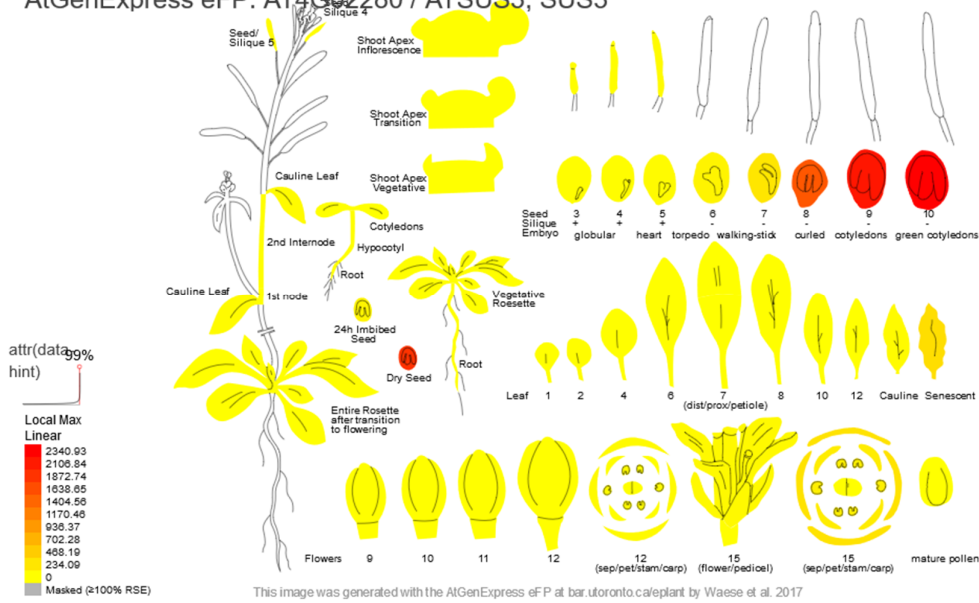

AtGenExpress eFP: AT3G43190 / *ATSUS4*, *SUS4*

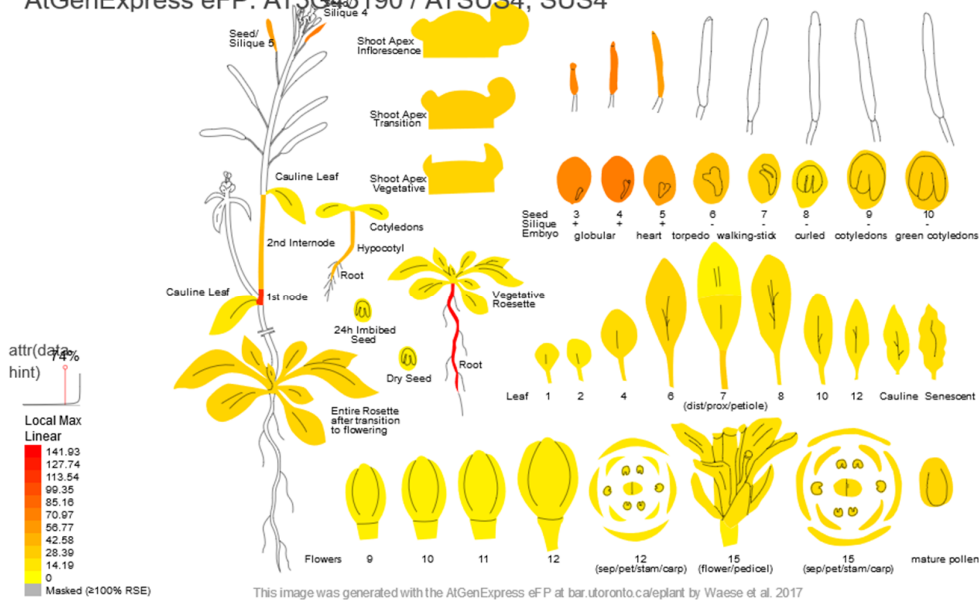

**Supplementary Figure S4b. Expression atlas of Arabidopsis *SUS3* and *SUS4* transcripts.**

*SUS3* (At4g02280) and *SUS4* (At3g43190) transcript abundance in different Arabidopsis tissues and developmental stages based on Affymetrix ATH1 array data from Schmid et al. (2005), and visualized with the Plant eFP browser (<https://bar.utoronto.ca/eplant>; Winter et al. (2007); Waese et al. (2017)).

AtGenExpress eFP: AT5G37180 / *SUS5*, *SUS5*

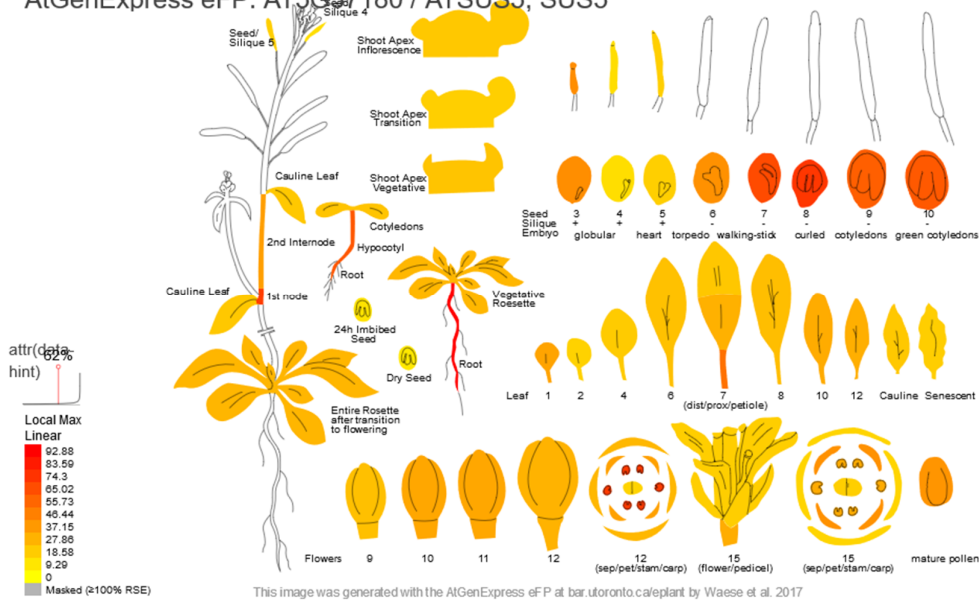

AtGenExpress eFP: AT1G73370 / *SUS6*, *SUS6*

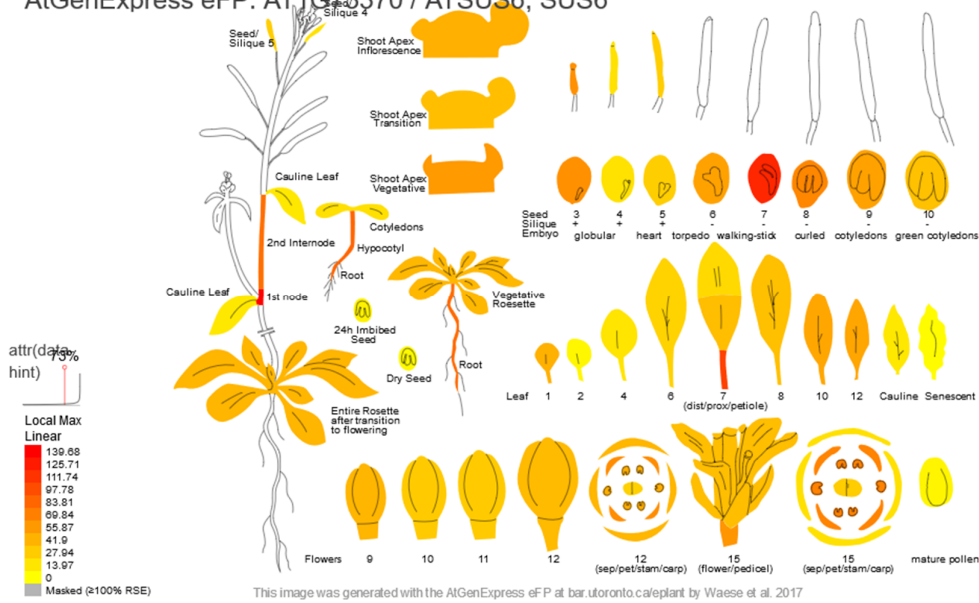

**Supplementary Figure S4c. Expression atlas of Arabidopsis *SUS5* and *SUS6* transcripts.**

*SUS5* (At5g37180) and *SUS6* (At1g73370) transcript abundance in different Arabidopsis tissues and developmental stages based on Affymetrix ATH1 array data from Schmid et al. (2005), and visualized with the Plant eFP browser (<https://bar.utoronto.ca/eplant>; Winter et al. (2007); Waese et al. (2017)).

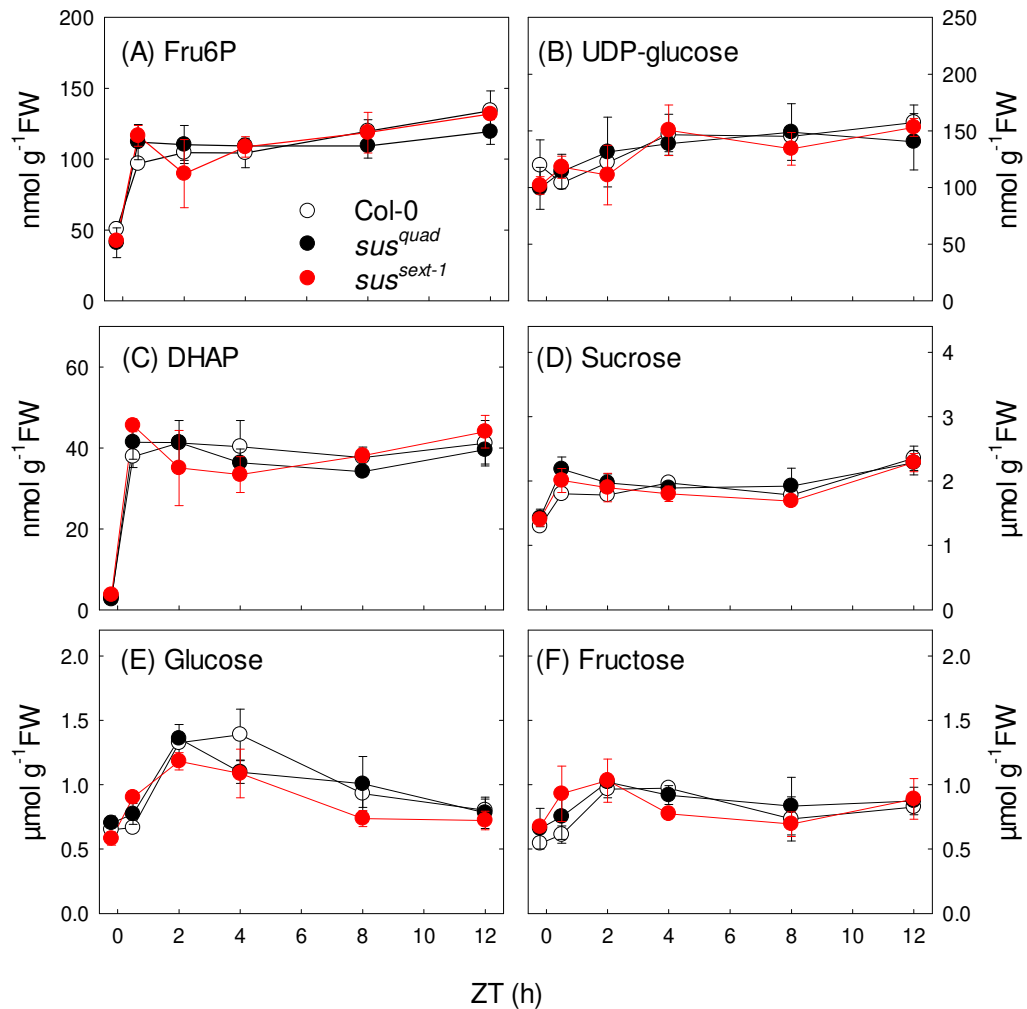

**Supplementary Figure S5. Metabolite levels in wild-type *Arabidopsis* and *sus* mutants.**

Wild-type Col-0, and the *sus1234* mutant (*sus<sup>quad</sup>*) and *sus12345<sup>16</sup>* (*sus<sup>sext-1</sup>*) mutants were grown in long-day conditions (16-h photoperiod). At 25 days after germination, rosettes were harvested just before dawn (ZT-0.2) and at intervals from ZT0.5 to ZT12 for measurement of: (A) fructose 6-phosphate (Fru6P), (B) UDP-glucose, (C) dihydroxyacetone-phosphate (DHAP), (D) sucrose, (E) glucose and (F) fructose. Data are from the same experiment as Fig. 5 and presented as mean  $\pm$  S.D. ( $n=3$  biological replicates). *P*-values for all genotype  $\times$  genotype comparisons are shown in Supplementary Table S3.



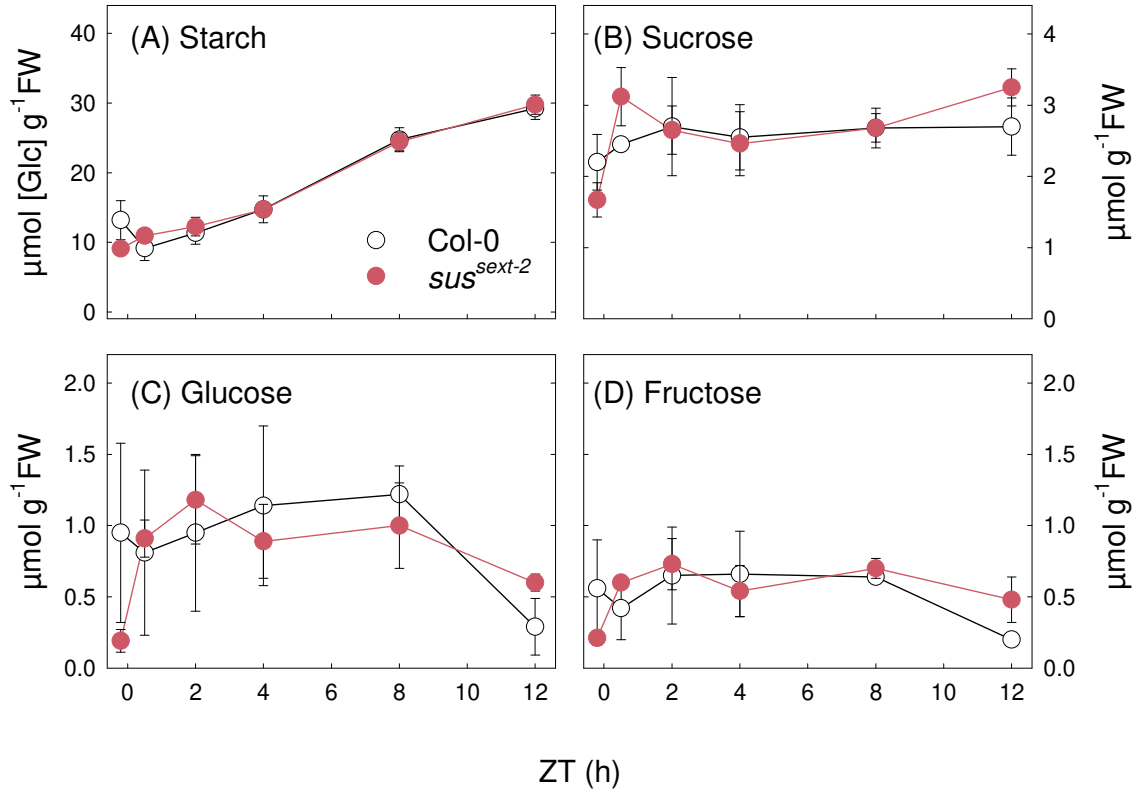

**Supplementary Figure S6. Starch and sugar levels in wild-type Arabidopsis (Col-0) and the *sus12345<sup>2</sup>6* mutant (*sus<sup>sext-2</sup>*)**

Plants were grown in long-day conditions (16-h photoperiod). At 25 days after germination, rosettes were harvested just before dawn (ZT-0.2) and at intervals from ZT0.5 to ZT12 for measurement of: (A) starch, (B) sucrose, (C) glucose and (D) fructose. Data are mean  $\pm$  S.D. from three independently pooled batches of five rosettes ( $n=3$  biological replicates).

**Supplementary Table S2. Statistical analysis of metabolite data in Figure 3.**

Metabolite levels in rosettes of Col-0, *sus1234* (*sus<sup>quad</sup>*), *pgm* and *adg1* were compared across all sampling times by two-way ANOVA with Tukey's honestly significant difference test. In columns 2-5, letters indicate significant differences between genotypes, with the *P*-value shown in column 6 and level of significance in column 7. \**P*<0.05; \*\**P*<0.01; \*\*\**P*<0.001; n.s., not significant.

| <b>Metabolite</b> | <b>Col-0</b> | <b><i>sus<sup>quad</sup></i></b> | <b><i>pgm</i></b> | <b><i>adg1</i></b> | <b><i>P</i>-value</b> | <b>Significance</b> |
|-------------------|--------------|----------------------------------|-------------------|--------------------|-----------------------|---------------------|
| Glc6P             | b            | ab                               | a                 | a                  | <0.001                | ***                 |
| Glc1P             | bc           | ab                               | c                 | a                  | 0.166                 | n.s.                |
| ADP-Glc           | a            | a                                | b                 | b                  | <0.001                | ***                 |
| Starch            | a            | a                                | b                 | b                  | <0.001                | ***                 |

**Supplementary Table S3. Statistical analysis of metabolite data in Figure 5 and Supplemental Figure S5.**

Metabolite levels in rosettes of Col-0, *sus1234* (*sus<sup>quad</sup>*) and *sus123456* (*sus<sup>sext-1</sup>*) were compared across all sampling times by two-way ANOVA with Tukey's honestly significant difference test. In columns 2-4, letters indicate genotypes that were not significantly different for a given metabolite, with the *P*-value shown in column 5 and level of significance in column 6. n.s., not significant.

| <b>Metabolite</b> | <b>Col-0</b> | <b><i>sus<sup>quad</sup></i></b> | <b><i>sus<sup>sext-1</sup></i></b> | <b><i>P</i>-value</b> | <b>Significance</b> |
|-------------------|--------------|----------------------------------|------------------------------------|-----------------------|---------------------|
| Glc6P             | a            | a                                | a                                  | 0.518                 | n.s.                |
| Glc1P             | a            | a                                | a                                  | 0.382                 | n.s.                |
| ADPG              | a            | a                                | a                                  | 0.774                 | n.s.                |
| Starch            | a            | a                                | a                                  | 0.228                 | n.s.                |
| Fru6P             | a            | a                                | a                                  | 0.981                 | n.s.                |
| UDPG              | a            | a                                | a                                  | 0.752                 | n.s.                |
| DHAP              | a            | a                                | a                                  | 0.973                 | n.s.                |
| Sucrose           | a            | a                                | a                                  | 0.360                 | n.s.                |
| Glucose           | a            | a                                | a                                  | 0.535                 | n.s.                |
| Fructose          | a            | a                                | a                                  | 0.471                 | n.s.                |

**Supplementary Table S4. Oligonucleotide primers for PCR genotyping.**

| <b>Primer</b>                    | <b>Sequence (5'→3')</b>   |
|----------------------------------|---------------------------|
| <i>SUS genomic primers</i>       |                           |
| SUS1-LP                          | ATGGCAAACGCTGAACGTATG     |
| SUS1-RP                          | CTCAAGAGTGCAAGGATCAGG     |
| SUS2-LP                          | ATGCGGAGACAAAATCACAAC     |
| SUS2-RP                          | TAAGACTGTGAAAGTTGATGG     |
| SUS3-LP                          | ATCGATGTGTTTGATCCGAAG     |
| SUS3-RP                          | TTGGAGACCAGCGTCTGATAC     |
| SUS4-LP                          | ATGGCAAACGCAGAACGTGTAA    |
| SUS4-RP                          | CTTAGTCTTCTCCAAAGCATG     |
| sus5-Fw                          | CGGATGACTCTATCTATTTCCCT   |
| sus5-Rv                          | GAGACGTACATGTGTTTCGTCATTC |
| sus6-Fw                          | ATGCTTGCTGTGATTGTTGTCTCG  |
| sus6-Rv                          | CGAGGTAAGGGTAGATATCGAATC  |
| <i>T-DNA left border primers</i> |                           |
| LBb1.3                           | ATTTTGCCGATTTCCGGAAC      |
| P66                              | CCCCTGCGCTGACAGCCGGAACACG |
